# Supplementary material
Source: Springer Nature journal article supplement (https://www.springermedizin.de/resource/supplementary/12885_2009_1591_MOESM2_ESM.pdf/9472420)

A

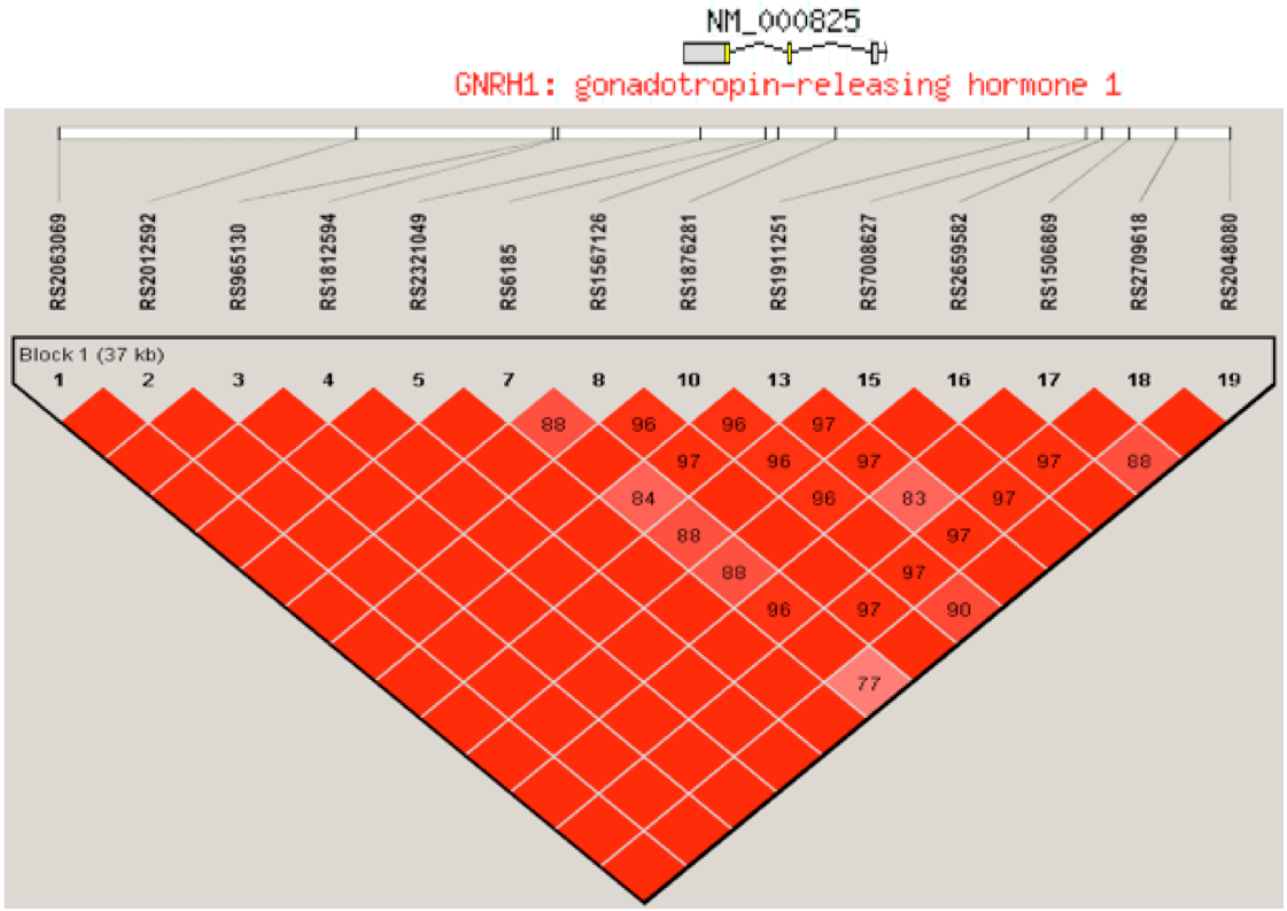

B

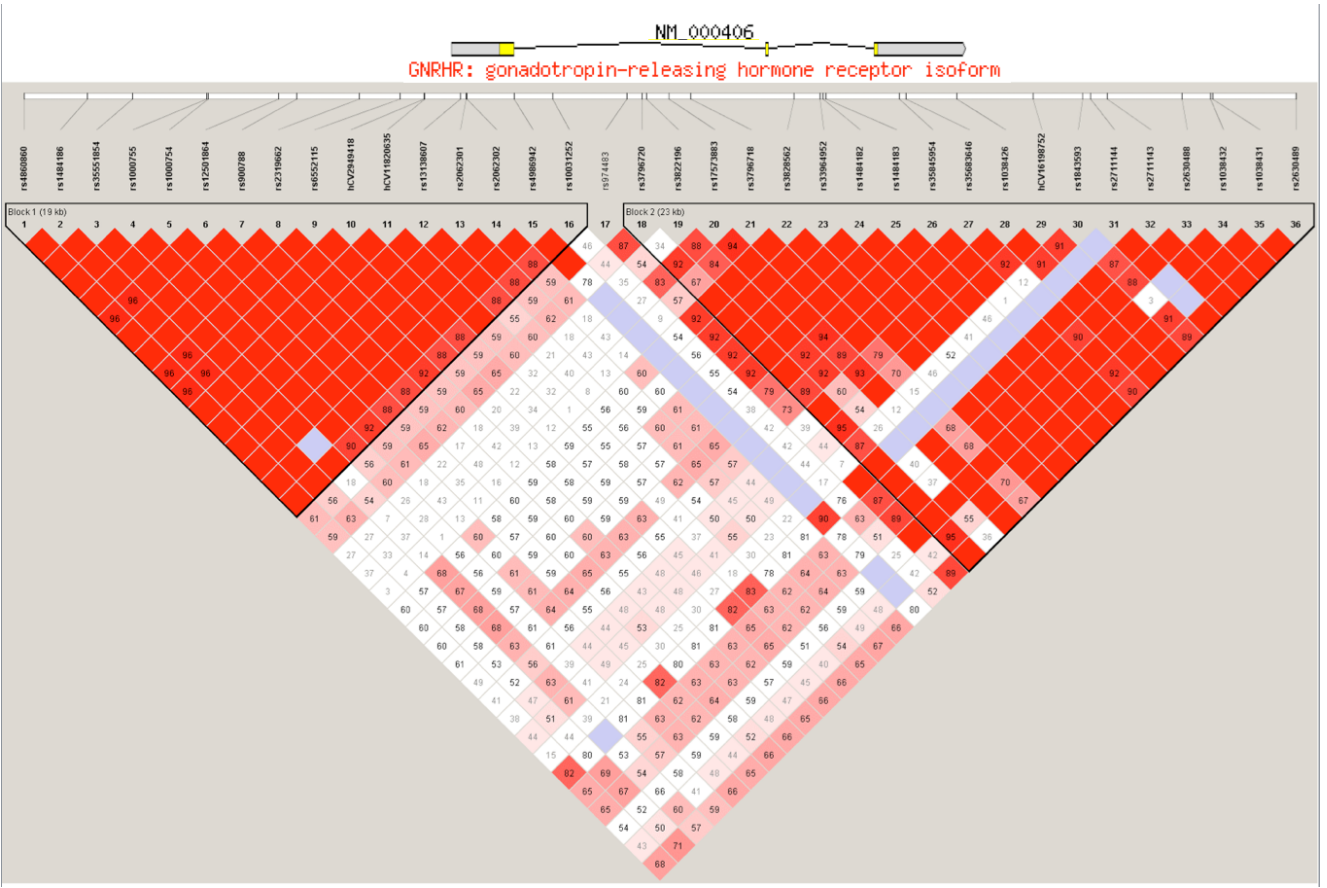

Supplement: MOESM2 [file 9472420]
